# Supplementary material
Source: Springer Nature journal article supplement (https://www.springermedizin.de/resource/supplementary/12936_2011_2072_MOESM3_ESM.pdf/9542482)

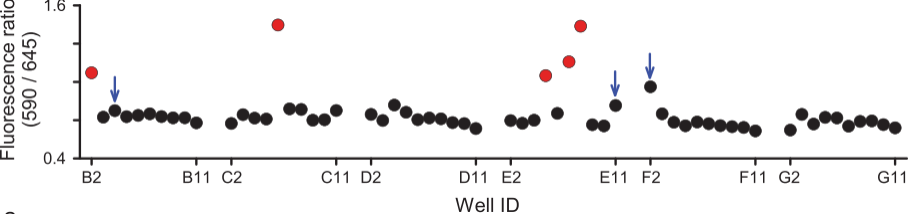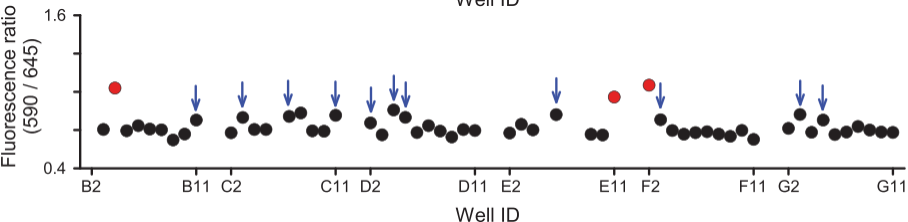

Supplement: MOESM3 [file 9542482]
